# Supplementary material for: Exchange of equatorial ligands in protein-bound paddlewheel Ru 2 5+ complexes: new insights from X-ray crystallography and quantum chemistry
Source: Royal Society of Chemistry journal article supplement (doi:10.1039/d4qi01846j), 2024-01-01
Supplement: d4qi01846j1.pdf [file d4qi01846j1.pdf]

# Supporting Information

## Exchange of Equatorial Ligands in Protein-bound Paddlewheel $\text{Ru}_2^{5+}$ Complexes: New Insights from X-ray Crystallography and Quantum Chemistry

Aarón Terán,<sup>a</sup> Francesca Fasulo,<sup>a</sup> Giarita Ferraro,<sup>b</sup> Ana Edilia Sánchez-Peláez,<sup>c</sup> Santiago Herrero,<sup>c,d</sup> Michele Pavone,<sup>b</sup> Ana Belén Muñoz-García,<sup>a,\*</sup> Antonello Merlino<sup>b,\*</sup>

<sup>a</sup>Department of Physics “Ettore Pancini”, University of Naples Federico II, Complesso Universitario di Monte Sant’Angelo—Via Cinthia, 21, Naples 80126, Italy.

<sup>b</sup>Department of Chemical Science, University of Naples Federico II, Complesso Universitario di Monte Sant’Angelo—Via Cinthia, 21, Naples 80126, Italy.

<sup>c</sup>MatMoPol Research Group, Department of Inorganic Chemistry, Faculty of Chemical Sciences, Complutense University of Madrid, Avda. Complutense s/n, 28040 Madrid, Spain.

<sup>d</sup>Knowledge Technology Institute, Complutense University of Madrid, Campus de Somosaguas, 28223 Pozuelo de Alarcón, Madrid, Spain.

\*E-mails: [antonello.merlino@unina.it](mailto:antonello.merlino@unina.it) and [anabelen.munozgarcia@unina.it](mailto:anabelen.munozgarcia@unina.it)

## Index

|                                                                                                                                                                                                                                               |    |
|-----------------------------------------------------------------------------------------------------------------------------------------------------------------------------------------------------------------------------------------------|----|
| <b>Table S1.</b> Data collection and refinement statistics.....                                                                                                                                                                               | 3  |
| <b>Figure S1.</b> Asymmetric unit representation and selected distances of compound [Ru <sub>2</sub> Cl(D- <i>p</i> -CNPhF)(O <sub>2</sub> CCH <sub>3</sub> ) <sub>3</sub> ] <sub>n</sub> . Hydrogen atoms have been omitted for clarity..... | 4  |
| <b>Figure S2.</b> Computational ground state structure and selected distances of complex <b>1</b> . Hydrogen atoms have been omitted for clarity. O7 is a water molecule. ....                                                                | 5  |
| <b>Figure S3.</b> Computational ground state structure and selected distances of complex <b>2</b> . Hydrogen atoms have been omitted for clarity. O7 and O8 are water molecules. ....                                                         | 6  |
| <b>Figure S4.</b> Computational ground state structure and selected distances of complex <b>3</b> . Hydrogen atoms have been omitted for clarity. ....                                                                                        | 7  |
| <b>Figure S5.</b> Computational ground state structure and selected distances of complex <b>4</b> . Hydrogen atoms have been omitted for clarity. O7 is a water molecule. ....                                                                | 8  |
| <b>Figure S6.</b> Computational ground state structure and selected distances of complex <b>5</b> . Hydrogen atoms have been omitted for clarity. O3, O4, and O7 are water molecules. ....                                                    | 9  |
| <b>Figure S7.</b> Computational ground state structure and selected distances of complex <b>6</b> . Hydrogen atoms have been omitted for clarity. O1, O2, and O7 are water molecules. ....                                                    | 10 |
| <b>Figure S8.</b> Computational ground state structure and selected distances of complex <b>7</b> . Hydrogen atoms have been omitted for clarity. O3, O4, O7, and O8 are water molecules.....                                                 | 11 |
| <b>Figure S9.</b> Computational ground state structure and selected distances of complex <b>8</b> . Hydrogen atoms have been omitted for clarity. O5, O6, O7, and O8 are water molecules.....                                                 | 12 |
| <b>Figure S10.</b> Close-up of the crystal packing in the Ru <sub>2</sub> /RNase A adduct. Symmetry mates are in grey. Water molecules are represented as non-bonded grey and red spheres.....                                                | 13 |

**Table S1.** Data collection and refinement statistics.

| <b>Compound</b>                          | <b>[Ru<sub>2</sub>Cl(D-<i>p</i>-CNPhF)(O<sub>2</sub>CCH<sub>3</sub>)<sub>3</sub>]<sub>n</sub> + RNase A</b> |
|------------------------------------------|-------------------------------------------------------------------------------------------------------------|
| <b>PDB code</b>                          | 9FYW                                                                                                        |
| <b>Crystallization conditions</b>        | 22% PEG4K and 10 mM sodium citrate at pH 5.1                                                                |
| <b>Soaking time</b>                      | 7 days                                                                                                      |
| <b>Data collection</b>                   |                                                                                                             |
| Space group                              | C2                                                                                                          |
| a (Å)                                    | 100.62                                                                                                      |
| b (Å)                                    | 32.74                                                                                                       |
| c (Å)                                    | 72.25                                                                                                       |
| α/β/γ (°)                                | 90.0/90.29/90.0                                                                                             |
| Molecules for asymmetric unit            | 2                                                                                                           |
| Resolution range (Å)                     | 72.25-1.40 (1.53-1.40)                                                                                      |
| Observations                             | 196542 (3145)                                                                                               |
| Unique reflections                       | 34804 (960)                                                                                                 |
| Completeness (%)                         | 91.0 (50.4)                                                                                                 |
| Redundancy                               | 5.6 (3.3)                                                                                                   |
| Rmerge (%)                               | 0.048 (0.494)                                                                                               |
| Average I/σ(I)                           | 19.4 (2.2)                                                                                                  |
| CC <sub>1/2</sub>                        | 0.999 (0.820)                                                                                               |
| Anom. completeness (%)                   | 89.4 (45.6)                                                                                                 |
| Anom. Multiplicity                       | 2.9 (1.7)                                                                                                   |
| <b>Refinement</b>                        |                                                                                                             |
| Resolution (Å)                           | 1.40                                                                                                        |
| N° reflections                           | 35176                                                                                                       |
| N° reflections in working set            | 376                                                                                                         |
| R <sub>factor</sub> /R <sub>free</sub>   | 0.176/0.214                                                                                                 |
| N° non-H atoms in the refin.             | 2327                                                                                                        |
| <b>Average B-factors (Å<sup>2</sup>)</b> |                                                                                                             |
| All atoms                                | 19.483                                                                                                      |
| Ru atoms                                 | 32.11/25.52                                                                                                 |
| Ru occupancy                             | 0.35                                                                                                        |
| Ramachandran statistics                  |                                                                                                             |
| Most favoured                            | 201 (95.26 %)                                                                                               |
| Outliers                                 | 3                                                                                                           |
| RMSD bonds (Å)                           | 0.010                                                                                                       |
| RMSD angles (°)                          | 1.756                                                                                                       |

†Rmerge =  $\frac{\sum h \sum i |I(h,i) - \langle I(h) \rangle|}{\sum h \sum i I(h,i)}$ , where I(h,i) is the intensity of the i<sup>th</sup> measurement of reflection h and  $\langle I(h) \rangle$  is the mean value of the intensity of reflection h

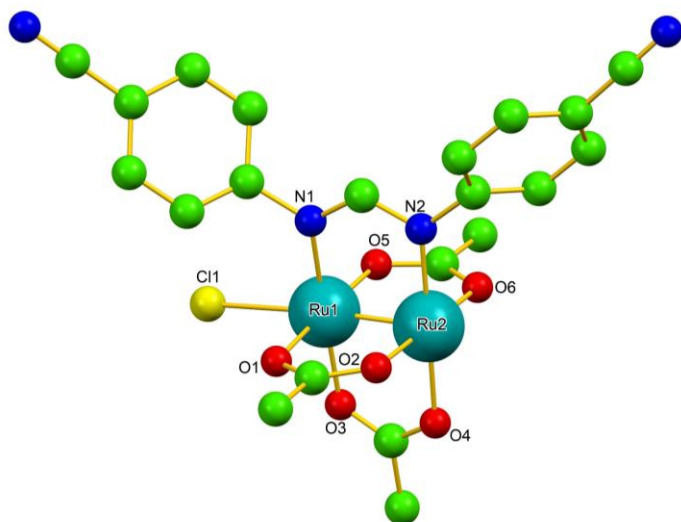

| Atoms   | Distance / Å |
|---------|--------------|
| Ru1-Ru2 | 2.307        |
| Ru1-Cl1 | 2.625        |
| Ru1-O1  | 2.045        |
| Ru1-O3  | 2.057        |
| Ru1-O5  | 2.038        |
| Ru1-N1  | 2.044        |
| Ru2-O2  | 2.045        |
| Ru2-O4  | 2.054        |
| Ru2-O6  | 2.033        |
| Ru2-N2  | 2.039        |

**[Ru<sub>2</sub>Cl(D-*p*-CNPhF)(O<sub>2</sub>CCH<sub>3</sub>)<sub>3</sub>]**

**Figure S1.** Asymmetric unit representation and selected distances of compound [Ru<sub>2</sub>Cl(D-*p*-CNPhF)(O<sub>2</sub>CCH<sub>3</sub>)<sub>3</sub>]<sub>n</sub>. Hydrogen atoms have been omitted for clarity.

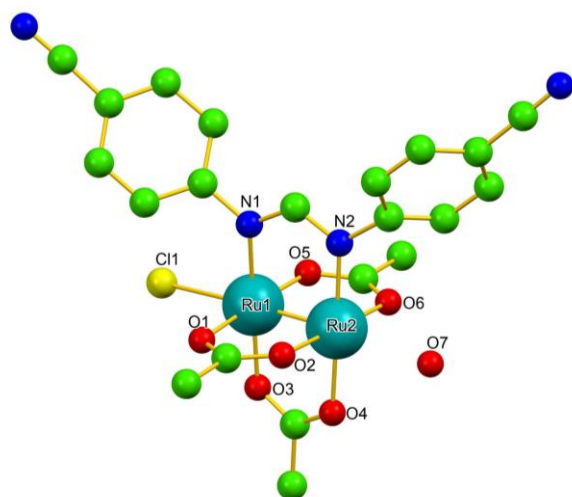

| Atoms   | Distance / Å |
|---------|--------------|
| Ru1-Ru2 | 2.307        |
| Ru1-Cl1 | 2.635        |
| Ru1-O1  | 2.033        |
| Ru1-O3  | 2.054        |
| Ru1-O5  | 2.042        |
| Ru1-N1  | 2.039        |
| Ru2-O2  | 2.038        |
| Ru2-O4  | 2.057        |
| Ru2-O6  | 2.045        |
| Ru2-O7  | 2.625        |
| Ru2-N2  | 2.044        |

**Compound 1**

**Figure S2.** Computational ground state structure and selected distances of complex **1**. Hydrogen atoms have been omitted for clarity. O7 is a water molecule.

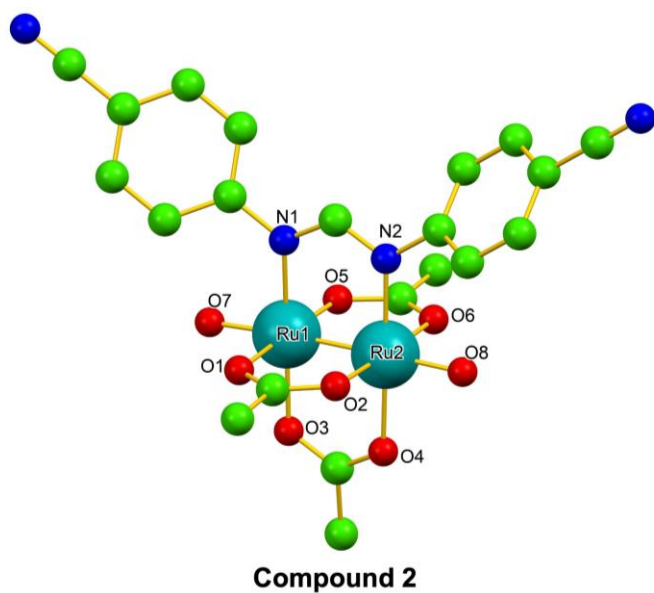

| Atoms   | Distance / Å |
|---------|--------------|
| Ru1-Ru2 | 2.307        |
| Ru1-O1  | 2.105        |
| Ru1-O3  | 2.122        |
| Ru1-O5  | 2.089        |
| Ru1-O7  | 1.773        |
| Ru1-N1  | 2.068        |
| Ru2-O2  | 2.078        |
| Ru2-O4  | 2.126        |
| Ru2-O6  | 2.112        |
| Ru2-O8  | 1.777        |
| Ru2-N2  | 2.068        |

**Figure S3.** Computational ground state structure and selected distances of complex **2**. Hydrogen atoms have been omitted for clarity. O7 and O8 are water molecules.

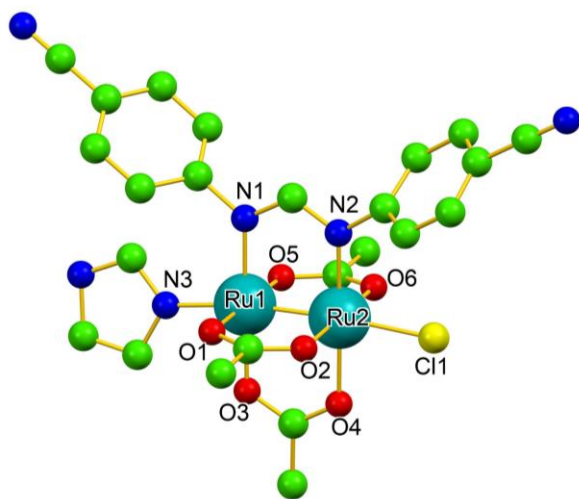

**Compound 3**

| Atoms   | Distance / Å |
|---------|--------------|
| Ru1-Ru2 | 2.293        |
| Ru1-O1  | 2.022        |
| Ru1-O3  | 2.039        |
| Ru1-O5  | 2.037        |
| Ru1-O7  | 1.773        |
| Ru1-N1  | 2.017        |
| Ru1-N3  | 1.940        |
| Ru2-O2  | 2.049        |
| Ru2-O4  | 2.066        |
| Ru2-O6  | 2.019        |
| Ru2-Cl1 | 2.230        |
| Ru2-N2  | 2.013        |

**Figure S4.** Computational ground state structure and selected distances of complex **3**. Hydrogen atoms have been omitted for clarity.

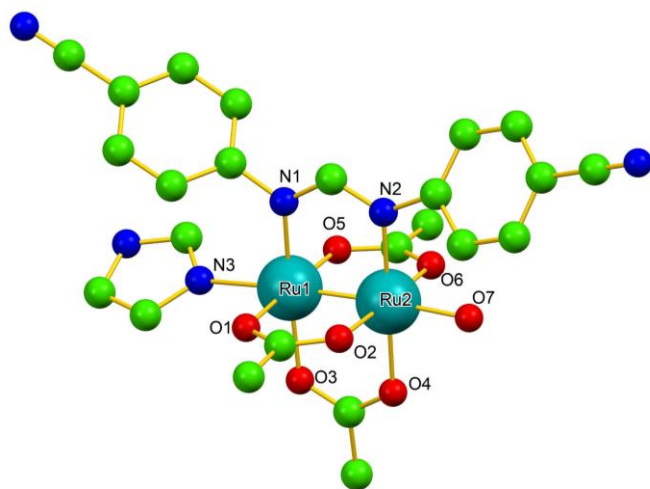

| Atoms   | Distance / Å |
|---------|--------------|
| Ru1-Ru2 | 2.339        |
| Ru1-O1  | 2.080        |
| Ru1-O3  | 2.150        |
| Ru1-O5  | 2.101        |
| Ru1-N1  | 2.028        |
| Ru1-N3  | 2.286        |
| Ru2-O2  | 2.114        |
| Ru2-O4  | 2.113        |
| Ru2-O6  | 2.096        |
| Ru2-O7  | 1.966        |
| Ru2-N2  | 2.070        |

**Compound 4**

**Figure S5.** Computational ground state structure and selected distances of complex **4**. Hydrogen atoms have been omitted for clarity. O7 is a water molecule.



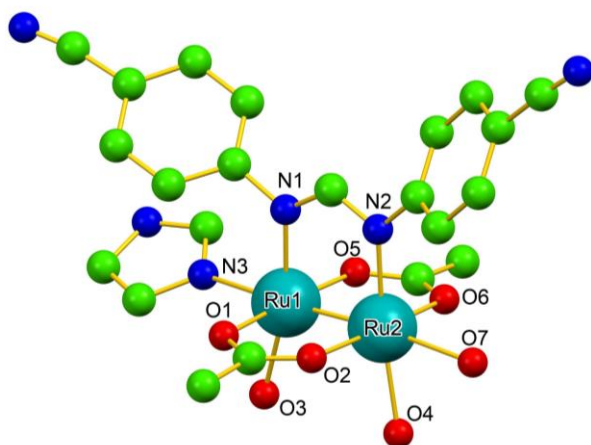

**Compound 5**

| Atoms   | Distance / Å |
|---------|--------------|
| Ru1-Ru2 | 2.428        |
| Ru1-O1  | 2.077        |
| Ru1-O3  | 2.203        |
| Ru1-O5  | 2.097        |
| Ru1-N1  | 2.041        |
| Ru1-N3  | 2.369        |
| Ru2-O2  | 2.124        |
| Ru2-O4  | 2.202        |
| Ru2-O6  | 2.099        |
| Ru2-O7  | 2.351        |
| Ru2-N2  | 2.115        |

**Figure S6.** Computational ground state structure and selected distances of complex **5**. Hydrogen atoms have been omitted for clarity. O3, O4, and O7 are water molecules.

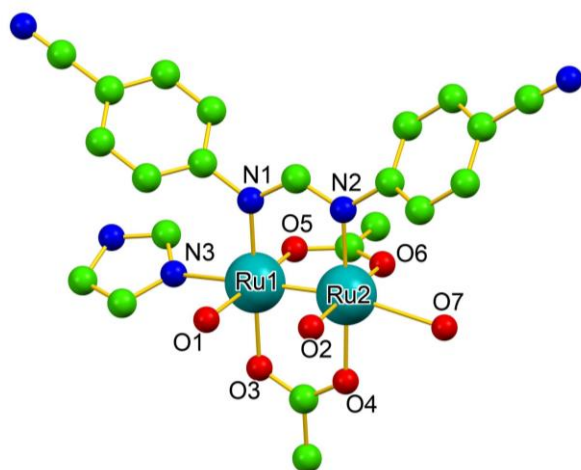

| Atoms   | Distance / Å |
|---------|--------------|
| Ru1-Ru2 | 2.319        |
| Ru1-O1  | 2.156        |
| Ru1-O3  | 2.121        |
| Ru1-O5  | 2.053        |
| Ru1-N1  | 2.042        |
| Ru1-N3  | 2.320        |
| Ru2-O2  | 2.185        |
| Ru2-O4  | 2.141        |
| Ru2-O6  | 2.073        |
| Ru2-O7  | 2.489        |
| Ru2-N2  | 2.083        |

**Compound 6**

**Figure S7.** Computational ground state structure and selected distances of complex **6**. Hydrogen atoms have been omitted for clarity. O1, O2, and O7 are water molecules.

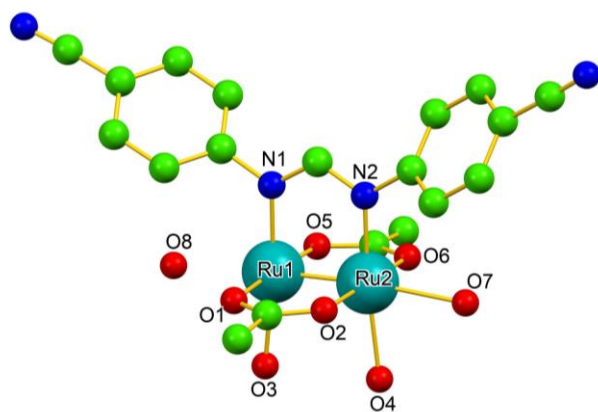

| Atoms   | Distance / Å |
|---------|--------------|
| Ru1-Ru2 | 2.336        |
| Ru1-O1  | 2.082        |
| Ru1-O3  | 2.236        |
| Ru1-O5  | 2.094        |
| Ru1-O8  | 2.612        |
| Ru1-N1  | 2.031        |
| Ru2-O2  | 2.091        |
| Ru2-O4  | 2.230        |
| Ru2-O6  | 2.098        |
| Ru2-O7  | 2.408        |
| Ru2-N2  | 2.029        |

**Compound 7**

**Figure S8.** Computational ground state structure and selected distances of complex **7**. Hydrogen atoms have been omitted for clarity. O3, O4, O7, and O8 are water molecules.

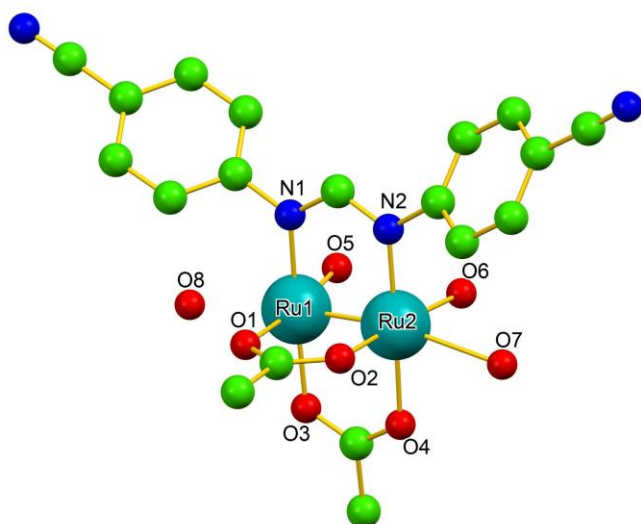

**Compound 8**

| Atoms   | Distance / Å |
|---------|--------------|
| Ru1-Ru2 | 2.348        |
| Ru1-O1  | 2.060        |
| Ru1-O3  | 2.122        |
| Ru1-O5  | 2.138        |
| Ru1-O8  | 2.686        |
| Ru1-N1  | 2.020        |
| Ru2-O2  | 2.036        |
| Ru2-O4  | 2.153        |
| Ru2-O6  | 2.145        |
| Ru2-O7  | 2.497        |
| Ru2-N2  | 2.029        |

**Figure S9.** Computational ground state structure and selected distances of complex **8**. Hydrogen atoms have been omitted for clarity. O5, O6, O7, and O8 are water molecules.

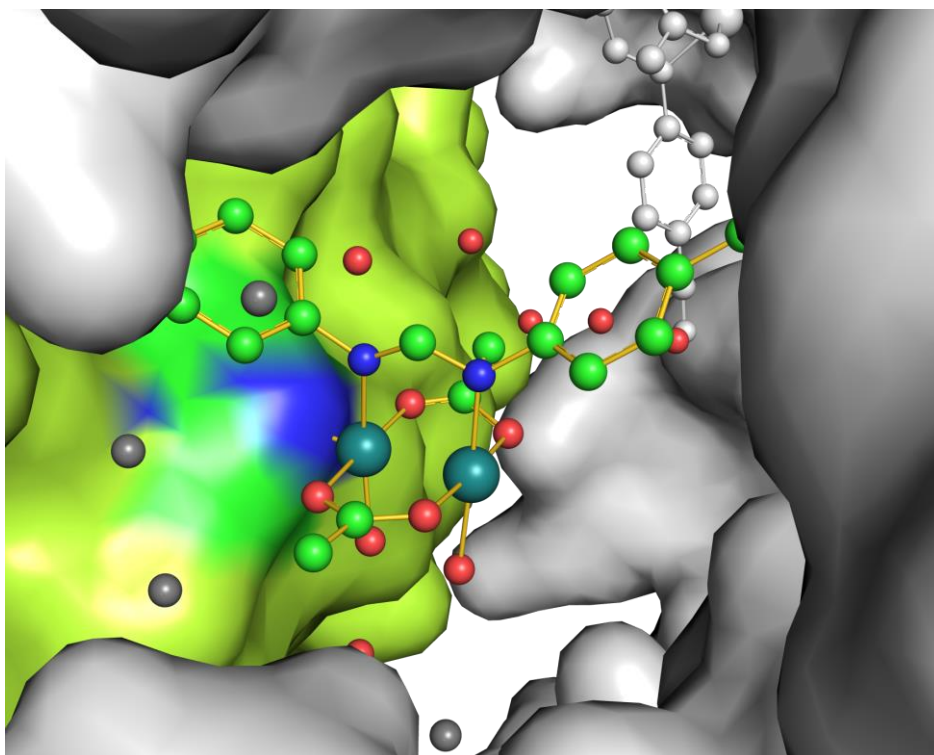

**Figure S10.** Close-up of the crystal packing in the Ru<sub>2</sub>/RNase A adduct. Symmetry mates are in grey. Water molecules are represented as non-bonded grey and red spheres.
